# Supplementary material for: Structural and physicochemical changes in almond milk during in vitro gastric digestion: impact on the delivery of protein and lipids
Source: Royal Society of Chemistry journal article supplement (doi:10.1039/c9fo02465d), 2020-01-01
Supplement: c9fo02465d2.pdf [file c9fo02465d2.pdf]

In the current study

|                                     |                                |      |         |
|-------------------------------------|--------------------------------|------|---------|
| At 15 min,                          | before emptying                |      |         |
| Pepsin used                         | P7000, sigma -aldrich          |      |         |
| protein content in the HGS (g)      | 200g*3%                        | 6    | g       |
| SGF added at 15 min (volume, mL)    | 2.5ml/min*15 min               | 37.5 | ml      |
| pepsin concentration in SGF         | 3.2g/L SGF                     |      |         |
| pepsin content in the HGS at 15 min | pepsin concentration*SGF adde  | 0.12 | g       |
| protein/enzyme ratio                | protein content/enzyme content | 50   | 50 to 1 |

In the Gailler et al 2012' study

|                      |         |                                             |
|----------------------|---------|---------------------------------------------|
| protein/enzyme ratio | 25 to 1 | The authors mentioned in the section 3.1.1. |
|----------------------|---------|---------------------------------------------|
